# Supplementary material
Source: PubMed Central journal article supplement (PMC8826505)
Supplement: djab169_supplementary_data.pdf [file djab169_supplementary_data.pdf]

## SUPPLEMENTARY MATERIALS

### Supplementary Tables

**Supplementary Table 1.** Homologous recombination-related genes

| No. | Gene          | Relation |
|-----|---------------|----------|
| 1   | <i>BARD1</i>  | Core     |
| 2   | <i>BLM</i>    | Core     |
| 3   | <i>BRCA1</i>  | Core     |
| 4   | <i>BRCA2</i>  | Core     |
| 5   | <i>BRIP1</i>  | Core     |
| 6   | <i>MRE11</i>  | Core     |
| 7   | <i>NBN</i>    | Core     |
| 8   | <i>PALB2</i>  | Core     |
| 9   | <i>RAD50</i>  | Core     |
| 10  | <i>RAD51</i>  | Core     |
| 11  | <i>RAD51B</i> | Core     |
| 1   | <i>ABL1</i>   | Related  |
| 2   | <i>ATM</i>    | Related  |
| 3   | <i>ATR</i>    | Related  |
| 4   | <i>BAP1</i>   | Related  |
| 5   | <i>CDK12</i>  | Related  |
| 6   | <i>CHEK1</i>  | Related  |
| 7   | <i>CHEK2</i>  | Related  |
| 8   | <i>DNMT3A</i> | Related  |
| 9   | <i>ERCC1</i>  | Related  |
| 10  | <i>ERCC4</i>  | Related  |
| 11  | <i>FANCA</i>  | Related  |
| 12  | <i>FANCC</i>  | Related  |
| 13  | <i>FANCD2</i> | Related  |
| 14  | <i>FANCE</i>  | Related  |
| 15  | <i>FANCF</i>  | Related  |
| 16  | <i>FANCG</i>  | Related  |
| 17  | <i>FANCL</i>  | Related  |
| 18  | <i>NONO</i>   | Related  |
| 19  | <i>RECQL4</i> | Related  |
| 20  | <i>RMI2</i>   | Related  |
| 21  | <i>SFPQ</i>   | Related  |
| 22  | <i>WRN</i>    | Related  |

Supplementary Table 2. Patients' characteristics based on homologous recombination machinery in the MSS/pMMR population

| Characteristics                    | MSS/pMMR population | HRP         | HRD with mutations in the "core" machinery | HRD with mutations in the "related" machinery | HRD with mutations in both "core" and "related" machinery | <i>P</i> <sup>a</sup> | <i>q</i> <sup>a</sup> | <i>P</i> <sup>b</sup> | <i>q</i> <sup>b</sup> | <i>P</i> <sup>c</sup> | <i>q</i> <sup>c</sup> |
|------------------------------------|---------------------|-------------|--------------------------------------------|-----------------------------------------------|-----------------------------------------------------------|-----------------------|-----------------------|-----------------------|-----------------------|-----------------------|-----------------------|
| Total No. (%)                      | 8702 (93.6)         | 7875 (90.5) | 289 (3.3)                                  | 498 (5.7)                                     | 40 (0.5)                                                  |                       |                       |                       |                       |                       |                       |
| Median age (range), y              | 60 (14-90)          | 60 (14-90)  | 60 (24-88)                                 | 60 (20-92)                                    | 52 (24-81)                                                | 0.32 <sup>d</sup>     | 0.46 <sup>d</sup>     | 0.70 <sup>d</sup>     | 0.75 <sup>d</sup>     | 0.0001 <sup>d</sup>   | <0.001 <sup>d</sup>   |
| Sex, No. (%)                       |                     |             |                                            |                                               |                                                           |                       |                       |                       |                       |                       |                       |
| Male                               | 4730 (54.4)         | 4299 (54.6) | 159 (55.0)                                 | 240 (48.2)                                    | 32 (80.0)                                                 | 0.89 <sup>e</sup>     | 0.89 <sup>e</sup>     | 0.01 <sup>e</sup>     | 0.02 <sup>e</sup>     | 0.001 <sup>e</sup>    | 0.004 <sup>e</sup>    |
| Female                             | 3972 (45.6)         | 3576 (45.4) | 130 (45.0)                                 | 258 (51.8)                                    | 8 (20.0)                                                  |                       |                       |                       |                       |                       |                       |
| Primary tumor location, No.        | 6280                | 5678        | 289                                        | 498                                           | 40                                                        |                       |                       |                       |                       |                       |                       |
| Left and Rectum, No. (%)           | 4326 (68.9)         | 3932 (69.2) | 145 (70.7)                                 | 231 (63.1)                                    | 18 (58.1)                                                 | 0.65 <sup>e</sup>     | 0.74 <sup>e</sup>     | 0.01 <sup>e</sup>     | 0.03 <sup>e</sup>     | 0.18 <sup>e</sup>     | 0.27 <sup>e</sup>     |
| Right, No. (%)                     | 1954 (31.1)         | 1746 (30.8) | 60 (29.3)                                  | 135 (36.9)                                    | 13 (41.9)                                                 |                       |                       |                       |                       |                       |                       |
| NA, No.                            | 2422                | 2197        | 84                                         | 132                                           | 9                                                         |                       |                       |                       |                       |                       |                       |
| <i>RAS</i> mutational status, No.  | 8697                | 7870        | 289                                        | 498                                           | 40                                                        |                       |                       |                       |                       |                       |                       |
| mut, No. (%)                       | 4706 (54.1)         | 4245 (53.9) | 152 (52.6)                                 | 290 (58.2)                                    | 21 (52.5)                                                 | 0.65 <sup>e</sup>     | 0.74 <sup>e</sup>     | 0.06 <sup>e</sup>     | 0.12 <sup>e</sup>     | 0.42 <sup>e</sup>     | 0.54 <sup>e</sup>     |
| wt, No. (%)                        | 3991 (45.9)         | 3625 (46.1) | 137 (47.4)                                 | 208 (41.8)                                    | 19 (47.5)                                                 |                       |                       |                       |                       |                       |                       |
| NA, No.                            | 5                   | 5           | 0                                          | 0                                             | 0                                                         |                       |                       |                       |                       |                       |                       |
| <i>BRAF</i> mutational status, No. | 8695                | 7870        | 289                                        | 496                                           | 40                                                        |                       |                       |                       |                       |                       |                       |
| mut, No. (%)                       | 598(6.9)            | 532 (6.8)   | 22 (7.6)                                   | 44 (8.9)                                      | 0 (0.0)                                                   | 0.57 <sup>e</sup>     | 0.71 <sup>e</sup>     | 0.07 <sup>e</sup>     | 0.12 <sup>e</sup>     | 0.09 <sup>e</sup>     | 0.14 <sup>e</sup>     |
| wt, No. (%)                        | 8097 (93.1)         | 7338 (93.8) | 269 (92.4)                                 | 452 (91.1)                                    | 40 (100.0)                                                |                       |                       |                       |                       |                       |                       |
| NA, No.                            | 7                   | 5           | 0                                          | 2                                             | 0                                                         |                       |                       |                       |                       |                       |                       |
| TMB-high (≥10 mut/Mb), No.         | 4838                | 4359        | 164                                        | 293                                           | 22                                                        |                       |                       |                       |                       |                       |                       |
| Yes, No. (%)                       | 136 (2.8)           | 97 (2.2)    | 11 (6.7)                                   | 12 (4.1)                                      | 16 (72.7)                                                 | <0.001 <sup>e</sup>   | 0.001 <sup>e</sup>    | 0.04 <sup>e</sup>     | 0.08 <sup>e</sup>     | <0.001 <sup>e</sup>   | <0.001 <sup>e</sup>   |
| No, No. (%)                        | 4702 (97.2)         | 4262 (97.8) | 153 (93.3)                                 | 281 (95.9)                                    | 6 (27.3)                                                  |                       |                       |                       |                       |                       |                       |
| NA, No.                            | 3864                | 3516        | 125                                        | 205                                           | 18                                                        |                       |                       |                       |                       |                       |                       |
| TMB (mut/Mb), No.                  | 4838                | 4359        | 164                                        | 293                                           | 22                                                        |                       |                       |                       |                       |                       |                       |
| Median (range)                     | 4 (0-446)           | 4 (0-115)   | 5 (0-124)                                  | 5 (1-211)                                     | 111.5 (2-446)                                             | <0.001 <sup>d</sup>   | <0.001 <sup>d</sup>   | 0.008 <sup>d</sup>    | 0.02 <sup>d</sup>     | <0.001 <sup>d</sup>   | <0.001 <sup>d</sup>   |
| PD-L1, No.                         | 8348                | 7562        | 278                                        | 469                                           | 39                                                        |                       |                       |                       |                       |                       |                       |
| Yes, No. (%)                       | 217 (2.6)           | 178 (2.4)   | 15 (5.4)                                   | 20 (4.3)                                      | 4 (10.3)                                                  | 0.001 <sup>e</sup>    | 0.004 <sup>e</sup>    | 0.01 <sup>e</sup>     | 0.02 <sup>e</sup>     | 0.001 <sup>e</sup>    | 0.004 <sup>e</sup>    |
| No, No. (%)                        | 8131 (97.4)         | 7384 (97.6) | 263 (94.6)                                 | 449 (95.7)                                    | 35 (89.7)                                                 |                       |                       |                       |                       |                       |                       |
| NA, No.                            | 354                 | 313         | 11                                         | 29                                            | 1                                                         |                       |                       |                       |                       |                       |                       |

|                   |            |            |           |           |          |                   |                   |                   |                   |    |    |
|-------------------|------------|------------|-----------|-----------|----------|-------------------|-------------------|-------------------|-------------------|----|----|
| CMS subtypes, No. | 1436       | 1301       | 51        | 82        | 2        |                   |                   |                   |                   |    |    |
| CMS1, No. (%)     | 139 (9.7)  | 122 (9.4)  | 6 (11.8)  | 10 (12.2) | 1 (50.0) | 0.75 <sup>e</sup> | 0.78 <sup>e</sup> | 0.39 <sup>e</sup> | 0.54 <sup>e</sup> | NA | NA |
| CMS2, No. (%)     | 448 (31.2) | 415 (31.9) | 14 (27.5) | 19 (23.2) | 0 (0.0)  |                   |                   |                   |                   |    |    |
| CMS3, No. (%)     | 153 (10.6) | 138 (10.6) | 4 (7.8)   | 10 (12.2) | 1 (50.0) |                   |                   |                   |                   |    |    |
| CMS4, No. (%)     | 696 (48.5) | 626 (48.1) | 27 (52.9) | 43 (52.5) | 0 (0.0)  |                   |                   |                   |                   |    |    |
| NA, No.           | 7266       | 6574       | 238       | 416       | 38       |                   |                   |                   |                   |    |    |

<sup>a</sup> HRP *versus* HRD with mutations in the “core” machinery. NA = not available; mut = mutation; MSS = microsatellite stable; pMMR = proficient mismatch repair; TMB = Tumor Mutational Burden; Mb = Mega-base; CMS = Consensus Molecular Subtype. Q = Benjamini-Hochberg adjusted p value.

<sup>b</sup> HRP *versus* HRD with mutations in the “related” machinery

<sup>c</sup> HRP *versus* HRD with mutations in both “core” and “related” machinery

<sup>d</sup> Two-sided Mann-Whitney test.

<sup>e</sup> Two-sided Chi-square test.

Supplementary Table 3. Patients' characteristics based on homologous recombination-related genes alterations in the MSS/pMMR population

| Characteristics                    | MSS/pMMR population | HRP         | HRD with <i>ATM</i> mutations | HRD with <i>BRCA1/2</i> mutations | HRD with other mutations | <i>p</i> <sup>a</sup> | q <sup>a</sup>    | <i>p</i> <sup>b</sup> | q <sup>b</sup>      | <i>p</i> <sup>c</sup> | q <sup>c</sup>     |
|------------------------------------|---------------------|-------------|-------------------------------|-----------------------------------|--------------------------|-----------------------|-------------------|-----------------------|---------------------|-----------------------|--------------------|
| Total No. (%)                      | 8702 (93.6)         | 7875 (90.5) | 275 (3.2)                     | 129 (1.5)                         | 378 (4.3)                |                       |                   |                       |                     |                       |                    |
| Median age (range), y              | 60 (14-90)          | 60 (14-90)  | 61 (20-90)                    | 60 (24-86)                        | 60 (27-92)               | 0.28 <sup>d</sup>     | 0.42 <sup>d</sup> | 0.58 <sup>d</sup>     | 0.71 <sup>d</sup>   | 0.28 <sup>d</sup>     | 0.42 <sup>d</sup>  |
| Sex, No. (%)                       |                     |             |                               |                                   |                          |                       |                   |                       |                     |                       |                    |
| Male                               | 4730 (54.4)         | 4299 (54.6) | 136 (49.5)                    | 66 (51.2)                         | 192 (50.8)               | 0.09 <sup>e</sup>     | 0.28 <sup>e</sup> | 0.44 <sup>e</sup>     | 0.62 <sup>e</sup>   | 0.15 <sup>e</sup>     | 0.29 <sup>e</sup>  |
| Female                             | 3972 (45.6)         | 3576 (45.4) | 139 (55.5)                    | 63 (48.8)                         | 186 (49.2)               |                       |                   |                       |                     |                       |                    |
| Primary tumor location, No.        | 6280                | 5678        | 275                           | 129                               | 378                      |                       |                   |                       |                     |                       |                    |
| Left and Rectum, No. (%)           | 4326 (68.9)         | 3932 (69.2) | 126 (63.6)                    | 62 (66.7)                         | 188 (67.9)               | 0.09 <sup>e</sup>     | 0.28 <sup>e</sup> | 0.59 <sup>e</sup>     | 0.71 <sup>e</sup>   | 0.63 <sup>e</sup>     | 0.71 <sup>e</sup>  |
| Right, No. (%)                     | 1954 (31.1)         | 1746 (30.8) | 72 (36.4)                     | 31 (33.3)                         | 89 (32.1)                |                       |                   |                       |                     |                       |                    |
| NA, No.                            | 2422                | 2197        | 77                            | 36                                | 101                      |                       |                   |                       |                     |                       |                    |
| <i>RAS</i> mutational status, No.  | 8697                | 7870        | 275                           | 129                               | 378                      |                       |                   |                       |                     |                       |                    |
| mut, No. (%)                       | 4706 (54.1)         | 4245 (53.9) | 169 (61.5)                    | 71 (55.0)                         | 199 (52.6)               | 0.01 <sup>e</sup>     | 0.06 <sup>e</sup> | 0.80 <sup>e</sup>     | 0.83 <sup>e</sup>   | 0.62 <sup>e</sup>     | 0.71 <sup>e</sup>  |
| wt, No. (%)                        | 3991 (45.9)         | 3625 (46.1) | 106 (38.5)                    | 58 (45.0)                         | 179 (47.4)               |                       |                   |                       |                     |                       |                    |
| NA, No.                            | 5                   | 5           | 0                             | 0                                 | 0                        |                       |                   |                       |                     |                       |                    |
| <i>BRAF</i> mutational status, No. | 8695                | 7870        | 275                           | 129                               | 378                      |                       |                   |                       |                     |                       |                    |
| mut, No. (%)                       | 598(6.9)            | 532 (6.8)   | 25 (9.1)                      | 13 (10.1)                         | 27 (7.2)                 | 0.13 <sup>e</sup>     | 0.29 <sup>e</sup> | 0.14 <sup>e</sup>     | 0.28 <sup>e</sup>   | 0.75 <sup>e</sup>     | 0.81 <sup>e</sup>  |
| wt, No. (%)                        | 8097 (93.1)         | 7338 (93.8) | 250 (90.9)                    | 116 (89.9)                        | 349 (92.8)               |                       |                   |                       |                     |                       |                    |
| NA, No.                            | 7                   | 5           | 0                             | 2                                 | 0                        |                       |                   |                       |                     |                       |                    |
| TMB-high (≥10 mut/Mb), No.         | 4838                | 4359        | 168                           | 76                                | 208                      |                       |                   |                       |                     |                       |                    |
| Yes, No. (%)                       | 136 (2.8)           | 97 (2.2)    | 4 (2.4)                       | 6 (7.9)                           | 12 (5.8)                 | 0.89 <sup>e</sup>     | 0.89 <sup>e</sup> | 0.001 <sup>e</sup>    | 0.007 <sup>e</sup>  | 0.001 <sup>e</sup>    | 0.007 <sup>e</sup> |
| No, No. (%)                        | 4702 (97.2)         | 4262 (97.8) | 164 (97.6)                    | 70 (92.1)                         | 196 (94.2)               |                       |                   |                       |                     |                       |                    |
| NA, No.                            | 3864                | 3516        | 107                           | 53                                | 170                      |                       |                   |                       |                     |                       |                    |
| TMB (mut/Mb), No.                  | 4838                | 4359        | 168                           | 76                                | 208                      |                       |                   |                       |                     |                       |                    |
| Median (range)                     | 4 (0-446)           | 4 (0-115)   | 5 (1-211)                     | 6 (0-124)                         | 5 (1-99)                 | 0.07 <sup>d</sup>     | 0.27 <sup>d</sup> | <0.001 <sup>d</sup>   | 0.007 <sup>d</sup>  | 0.005 <sup>d</sup>    | 0.03 <sup>d</sup>  |
| PD-L1, No.                         | 8348                | 7562        | 261                           | 124                               | 357                      |                       |                   |                       |                     |                       |                    |
| Yes, No. (%)                       | 217 (2.6)           | 178 (2.4)   | 10 (3.8)                      | 12 (9.7)                          | 13 (3.6)                 | 0.13 <sup>e</sup>     | 0.28 <sup>e</sup> | <0.001 <sup>e</sup>   | <0.001 <sup>e</sup> | 0.12 <sup>e</sup>     | 0.28 <sup>e</sup>  |
| No, No. (%)                        | 8131 (97.4)         | 7384 (97.6) | 251 (96.2)                    | 112 (90.3)                        | 344 (96.4)               |                       |                   |                       |                     |                       |                    |
| NA, No.                            | 354                 | 313         | 14                            | 5                                 | 19                       |                       |                   |                       |                     |                       |                    |
| CMS subtypes, No.                  | 1436                | 1301        | 45                            | 22                                | 63                       |                       |                   |                       |                     |                       |                    |
| CMS1, No. (%)                      | 139 (9.7)           | 122 (9.4)   | 5 (11.1)                      | 1 (4.6)                           | 8 (12.7)                 | 0.26 <sup>e</sup>     | 0.42 <sup>e</sup> | 0.186 <sup>e</sup>    | 0.335 <sup>e</sup>  | 0.58 <sup>e</sup>     | 0.71 <sup>e</sup>  |

|               |            |            |           |           |           |
|---------------|------------|------------|-----------|-----------|-----------|
| CMS2, No. (%) | 448 (31.2) | 415 (31.9) | 8 (17.8)  | 3 (13.6)  | 22 (34.9) |
| CMS3, No. (%) | 153 (10.6) | 138 (10.6) | 6 (13.3)  | 3 (13.6)  | 4 (6.4)   |
| CMS4, No. (%) | 696 (48.5) | 626 (48.1) | 26 (57.8) | 15 (68.2) | 29 (46.0) |
| NA, No.       | 7266       | 6574       | 230       | 107       | 315       |

---

<sup>a</sup> HRP *versus* HRD with ATM mutations. NA: not available; N: number; mut: mutation; MSS: microsatellite stable; pMMR: proficient mismatch repair; TMB: Tumor Mutational Burden; Mb: Mega-base; CMS: Consensus Molecular Subtype. q: Benjamini-Hochberg adjusted p value. A total of 214 samples that harbored a combination of *ATM*, *BRCA1/2*, and other HRD mutations were excluded from this analysis.

<sup>b</sup> HRP *versus* HRD with *BRCA1/2* mutations

<sup>c</sup> HRP *versus* HRD with other mutations

<sup>d</sup> Two-sided Mann-Whitney test.

<sup>e</sup> Two-sided Chi-square test.

Supplementary Table 4. MCP-counter analysis according to HR status

| Cell population         | MSS/pMMR (HRD n=135; HRP n=1283) |                       |      | MSI-H/dMMR (HRD n=76; HRP n=16) |                       |      |
|-------------------------|----------------------------------|-----------------------|------|---------------------------------|-----------------------|------|
|                         | Fold-change (HRD/HRP)            | <i>P</i> <sup>a</sup> | q    | Fold-change (HRD/HRP)           | <i>P</i> <sup>a</sup> | q    |
| T cells                 | 1.07                             | 0.31                  | 0.38 | 1.45                            | 0.37                  | 0.53 |
| CD8 T cells             | 1.27                             | 0.01                  | 0.09 | 1.80                            | 0.14                  | 0.41 |
| Cytotoxic lymphocytes   | 1.24                             | 0.004                 | 0.07 | 1.06                            | 0.83                  | 0.95 |
| NK cells                | 1.05                             | 0.46                  | 0.46 | 1.42                            | 0.18                  | 0.41 |
| B lineage               | 1.04                             | 0.07                  | 0.13 | 1.33                            | 0.24                  | 0.44 |
| Monocytic lineage       | 1.16                             | 0.02                  | 0.09 | 1.38                            | 0.12                  | 0.41 |
| Myeloid dendritic cells | 1.11                             | 0.03                  | 0.09 | 1.47                            | 0.25                  | 0.44 |
| Neutrophils             | 1.09                             | 0.09                  | 0.14 | 1.45                            | 0.04                  | 0.29 |
| Endothelial cells       | 1.15                             | 0.03                  | 0.09 | 1.31                            | 0.31                  | 0.50 |
| Fibroblasts             | 1.16                             | 0.04                  | 0.10 | 1.87                            | 0.001                 | 0.02 |
| Immune checkpoint       |                                  |                       |      |                                 |                       |      |
| PD-1                    | 1.16                             | 0.03                  | 0.39 | 1.07                            | 0.42                  | 0.56 |
| PD-L1                   | 1.19                             | 0.08                  | 0.13 | 1.06                            | 0.70                  | 0.87 |
| PD-L2                   | 1.02                             | 0.14                  | 0.18 | 1.74                            | 0.16                  | 0.41 |
| CTLA-4                  | 1.05                             | 0.39                  | 0.42 | 0.86                            | 0.98                  | 0.98 |
| TIM-3                   | 1.17                             | 0.02                  | 0.09 | 1.32                            | 0.17                  | 0.41 |
| LAG-3                   | 1.15                             | 0.08                  | 0.13 | 0.92                            | 0.97                  | 0.98 |

<sup>a</sup>The median gene expression levels were compared between each subgroup, and the fold change was calculated. To adjust P values for multiple hypothesis testing, the q values were calculated using the Benjamini–Hochberg method. Statistical tests are two-sided. HR: homologous recombination; HRD: homologous recombination deficiency; HRP: homologous recombination proficient; MSS: microsatellite stable; pMMR: mismatch repair proficient; MSI-H: microsatellite instability high; dMMR: mismatch repair deficient; q: Benjamini-Hochberg adjusted p value.

Supplementary Table 5. Patients' characteristics of the intention-to-treat and NGS cohorts of TRIBE2 population

| Characteristics                        | Intention-to-treat cohort<br>(N=679) | NGS cohort<br>(N=296) | <i>P</i>            |
|----------------------------------------|--------------------------------------|-----------------------|---------------------|
| Age, No.                               | 679                                  | 296                   |                     |
| Median (range), y                      | 61 (29-75)                           | 61 (29-75)            | 0.91 <sup>a</sup>   |
| Sex, No.                               | 679                                  | 296                   |                     |
| Male, No. (%)                          | 387 (57.0)                           | 160 (54.1)            | 0.39 <sup>b</sup>   |
| Female, No. (%)                        | 292 (43.0)                           | 136 (45.9)            |                     |
| ECOG-PS, No.                           | 679                                  | 296                   |                     |
| 0, No. (%)                             | 582 (85.7)                           | 267 (90.2)            | 0.06 <sup>b</sup>   |
| 1-2, No. (%)                           | 97 (14.3)                            | 29 (9.8)              |                     |
| Metastatic disease, No.                | 679                                  | 296                   |                     |
| Synchronous, No. (%)                   | 604 (89.0)                           | 265 (89.5)            | 0.79 <sup>b</sup>   |
| Metachronous, No. (%)                  | 75 (11.0)                            | 31 (10.5)             |                     |
| Prior Adjuvant chemotherapy, No.       | 679                                  | 296                   |                     |
| Yes, No. (%)                           | 15 (2.2)                             | 5 (1.7)               | 0.60 <sup>b</sup>   |
| No, No. (%)                            | 664 (97.8)                           | 291 (98.3)            |                     |
| Primary tumor location, No.            | 679                                  | 296                   |                     |
| Left and Rectum, No. (%)               | 420 (61.9)                           | 168 (56.8)            | 0.13 <sup>b</sup>   |
| Right, No. (%)                         | 259 (38.1)                           | 128 (43.2)            |                     |
| Mucinous histology, No.                | 675                                  | 294                   |                     |
| No, No. (%)                            | 581 (86.1)                           | 233 (79.3)            | 0.008 <sup>b</sup>  |
| Yes, No. (%)                           | 94 (13.9)                            | 61 (20.7)             |                     |
| NA, No.                                | 4                                    | 2                     |                     |
| Liver-only disease, No.                | 677                                  | 296                   |                     |
| Yes, No. (%)                           | 201 (29.7)                           | 83 (28.0)             | 0.60 <sup>b</sup>   |
| No, No. (%)                            | 476 (70.3)                           | 213 (72.0)            |                     |
| NA, No.                                | 2                                    | -                     |                     |
| Resected primary tumor, No.            | 679                                  | 296                   |                     |
| Yes, No. (%)                           | 346 (51.0)                           | 234 (79.1)            | <0.001 <sup>b</sup> |
| No, No. (%)                            | 333 (49.0)                           | 62 (20.9)             |                     |
| Mutational status, No.                 | 646                                  | 289                   |                     |
| <i>RAS</i> mut, No. (%)                | 436 (67.5)                           | 187 (64.7)            | 0.41 <sup>b</sup>   |
| <i>BRAF</i> mut, No. (%)               | 66 (10.2)                            | 38 (13.1)             |                     |
| <i>RAS</i> and <i>BRAF</i> wt, No. (%) | 144 (22.3)                           | 64 (22.2)             |                     |

|                     |            |            |                   |
|---------------------|------------|------------|-------------------|
| NA, No.             | 33         | 7          |                   |
| MS/MMR status, No.  | 554        | 287        |                   |
| MSI-H/dMMR, No. (%) | 26 (4.7)   | 16 (5.6)   | 0.58 <sup>b</sup> |
| MSS/pMMR, No. (%)   | 528 (95.3) | 271 (94.4) |                   |
| NA, No.             | 125        | 9          |                   |

---

<sup>a</sup> Two-sided Mann-Whitney test. ECOG-PS: Eastern Cooperative Oncology Group Performance Status; NA: not available; mut: mutated; wt: wild-type; MS: microsatellite; MMR: mismatch repair; MSI-H: microsatellite instability high; dMMR: deficient mismatch repair; MSS: microsatellite stable; pMMR: proficient mismatch repair; N: number.

<sup>b</sup> Two-sided Chi-square test.



Supplementary Table 6. Patients' characteristics in the TRIBE2 population

| Characteristics                                 | Overall population | MSS/pMMR population <sup>a</sup> (n=271) |            |                   |                   | MSI-H/dMMR population <sup>a</sup> (n=16) |            |                    |                   |
|-------------------------------------------------|--------------------|------------------------------------------|------------|-------------------|-------------------|-------------------------------------------|------------|--------------------|-------------------|
|                                                 |                    | HRD                                      | HRP        | <i>P</i>          | q                 | HRD                                       | HRP        | <i>P</i>           | q                 |
| Total, No. (%)                                  | 296 (100)          | 29 (10.7)                                | 242 (89.3) |                   |                   | 9 (56.3)                                  | 7 (43.7)   |                    |                   |
| Age, No.                                        | 296                | 29                                       | 242        |                   |                   | 9                                         | 7          |                    |                   |
| Median (range), y                               | 61 (29-75)         | 64 (32-75)                               | 61 (29-75) | 0.33 <sup>c</sup> | 0.33 <sup>c</sup> | 66 (54-71)                                | 55 (38-68) | 0.081 <sup>c</sup> | 0.24 <sup>c</sup> |
| Sex, No.                                        | 296                | 29                                       | 242        |                   |                   | 9                                         | 7          |                    |                   |
| Male, No. (%)                                   | 160 (54.1)         | 18 (62.1)                                | 128 (52.9) | 0.35 <sup>d</sup> | 1.0 <sup>d</sup>  | 5 (55.6)                                  | 4 (57.1)   | 1.0 <sup>e</sup>   | 1.0 <sup>e</sup>  |
| Female, No. (%)                                 | 136 (45.9)         | 11 (37.9)                                | 114 (47.1) |                   |                   | 4 (44.4)                                  | 3 (42.9)   |                    |                   |
| ECOG-PS, No.                                    | 296                | 29                                       | 242        |                   |                   | 9                                         | 7          |                    |                   |
| 0, No. (%)                                      | 267 (90.2)         | 27 (93.1)                                | 218 (90.1) | 1.0 <sup>e</sup>  | 1.0 <sup>e</sup>  | 8 (88.9)                                  | 7 (100)    | 1.0 <sup>e</sup>   | 1.0 <sup>e</sup>  |
| 1-2, No. (%)                                    | 29 (9.8)           | 2 (6.9)                                  | 24 (9.9)   |                   |                   | 1 (11.1)                                  | 0 (0.0)    |                    |                   |
| Metastatic disease, No.                         | 296                | 29                                       | 242        |                   |                   | 9                                         | 7          |                    |                   |
| Synchronous, No. (%)                            | 265 (89.5)         | 28 (96.6)                                | 215 (88.8) | 0.33 <sup>e</sup> | 0.50 <sup>e</sup> | 8 (88.9)                                  | 7 (100)    | 1.0 <sup>e</sup>   | 1.0 <sup>e</sup>  |
| Metachronous, No. (%)                           | 31 (10.5)          | 1 (3.4)                                  | 27 (11.2)  |                   |                   | 1 (11.1)                                  | 0 (0.0)    |                    |                   |
| Prior Adjuvant chemotherapy, No.                | 296                | 29                                       | 242        |                   |                   | 9                                         | 7          |                    |                   |
| Yes, No. (%)                                    | 5 (1.7)            | 0 (0.0)                                  | 5 (2.1)    | 1.0 <sup>e</sup>  | 1.0 <sup>e</sup>  | 0 (0.0)                                   | 0 (0.0)    | 1.0 <sup>e</sup>   | 1.0 <sup>e</sup>  |
| No, No. (%)                                     | 291 (98.3)         | 29 (100)                                 | 237 (97.9) |                   |                   | 9 (100)                                   | 7 (100)    |                    |                   |
| Primary tumor location, No.                     | 296                | 29                                       | 242        |                   |                   | 9                                         | 7          |                    |                   |
| Left and Rectum, No. (%)                        | 168 (56.8)         | 16 (55.2)                                | 143 (59.1) | 0.69 <sup>d</sup> | 0.69 <sup>d</sup> | 1 (11.1)                                  | 3 (42.9)   | 0.26 <sup>e</sup>  | 0.78 <sup>e</sup> |
| Right, No. (%)                                  | 128 (43.2)         | 13 (44.8)                                | 99 (40.9)  |                   |                   | 8 (88.9)                                  | 4 (57.1)   |                    |                   |
| Mucinous histology, No.                         | 294                | 29                                       | 240        |                   |                   | 9                                         | 7          |                    |                   |
| No, No. (%)                                     | 233 (79.3)         | 20 (69.0)                                | 194 (80.8) | 0.14 <sup>d</sup> | 0.42 <sup>d</sup> | 7 (77.8)                                  | 5 (71.4)   | 1.0 <sup>e</sup>   | 1.0 <sup>e</sup>  |
| Yes, No. (%)                                    | 61 (20.7)          | 9 (31.0)                                 | 46 (19.2)  |                   |                   | 2 (22.2)                                  | 2 (28.6)   |                    |                   |
| NA, No.                                         | 2                  | -                                        | 2          |                   |                   | -                                         | -          |                    |                   |
| Liver-only disease, No.                         | 296                | 29                                       | 242        |                   |                   | 9                                         | 7          |                    |                   |
| Yes, No. (%)                                    | 83 (28.0)          | 8 (27.6)                                 | 68 (28.1)  | 0.95 <sup>d</sup> | 1.0 <sup>d</sup>  | 3 (33.3)                                  | 3 (42.9)   | 1.0 <sup>e</sup>   | 1.0 <sup>e</sup>  |
| No, No. (%)                                     | 213 (72.0)         | 21 (72.4)                                | 174 (71.9) |                   |                   | 6 (66.7)                                  | 4 (57.1)   |                    |                   |
| Resected primary tumor, No.                     | 296                | 29                                       | 242        |                   |                   | 9                                         | 7          |                    |                   |
| Yes, No. (%)                                    | 234 (79.1)         | 24 (82.8)                                | 191 (78.9) | 0.81 <sup>e</sup> | 1.0 <sup>e</sup>  | 7 (77.8)                                  | 6 (85.7)   | 1.0 <sup>e</sup>   | 1.0 <sup>e</sup>  |
| No, No. (%)                                     | 62 (20.9)          | 5 (17.2)                                 | 51 (21.1)  |                   |                   | 2 (22.2)                                  | 1 (14.3)   |                    |                   |
| Mutational status <sup>a</sup> , No.            | 289                | 28                                       | 237        |                   |                   | 9                                         | 7          |                    |                   |
| <i>RAS</i> mut, No. (%)                         | 187 (64.7)         | 18 (64.2)                                | 160 (67.5) | 0.55 <sup>b</sup> | 0.55 <sup>b</sup> | 2 (22.2)                                  | 4 (57.1)   | 0.29 <sup>b</sup>  | 0.43 <sup>b</sup> |
| <i>BRAF</i> mut, No. (%)                        | 38 (13.1)          | 5 (17.9)                                 | 26 (11.0)  |                   |                   | 4 (44.5)                                  | 1 (14.3)   |                    |                   |
| <i>RAS</i> and <i>BRAF</i> wt, No. (%)          | 64 (22.2)          | 5 (17.9)                                 | 51 (21.5)  |                   |                   | 3 (33.3)                                  | 2 (28.6)   |                    |                   |
| NA, No.                                         | 7                  | 1                                        | 5          |                   |                   | -                                         | -          |                    |                   |
| TMB-high ( $\geq 10$ mut/Mb) <sup>b</sup> , No. | 223                | 22                                       | 185        |                   |                   | 4                                         | 5          |                    |                   |
| Yes, No. (%)                                    | 19 (8.5)           | 3 (13.6)                                 | 7 (3.8)    | 0.08 <sup>e</sup> | 0.11 <sup>e</sup> | 4 (100)                                   | 4 (80.0)   | 1.0 <sup>e</sup>   | 1.0 <sup>e</sup>  |

|                           |             |             |            |                    |                   |              |             |                   |                   |
|---------------------------|-------------|-------------|------------|--------------------|-------------------|--------------|-------------|-------------------|-------------------|
| No, No. (%)               | 204 (91.5)  | 19 (86.4)   | 178 (96.2) |                    |                   | 0 (0.0)      | 1 (20.0)    |                   |                   |
| NA, No.                   | 73          | 7           | 57         |                    |                   | 5            | 2           |                   |                   |
| TMB (mut/Mb) <sup>b</sup> | 223         | 22          | 185        |                    |                   | 4            | 5           |                   |                   |
| Median (range)            | 6 (2 – 207) | 6 (3 – 207) | 5 (2 – 11) | 0.008 <sup>c</sup> | 0.01 <sup>c</sup> | 37 (31 – 53) | 30 (4 – 37) | 0.07 <sup>c</sup> | 0.07 <sup>c</sup> |

<sup>a</sup> Local assessment. MSS: microsatellite stable; pMMR: proficient mismatch repair; MSI-H: microsatellite instability high; dMMR: deficient mismatch repair; HRD: homologous recombination deficiency; HRP: homologous recombination proficient; n: number; ECOG-PS: Eastern Cooperative Oncology Group Performance Status; NA: not available; mut: mutated; wt: wild-type; TMB: Tumor Mutational Burden; Mb: Mega-base. q: Benjamini-Hochberg adjusted p value.

<sup>b</sup> Caris MI TumorSeek Panel.

<sup>c</sup> Two-sided Mann-Whitney test.

<sup>d</sup> Two-sided Chi-square test.

<sup>e</sup> Two-sided Fisher's exact test.



|     |          |      |                    |      |   |   |      |                    |      |   |   |
|-----|----------|------|--------------------|------|---|---|------|--------------------|------|---|---|
| No  | 197 (95) | 10.7 | 1                  | 0.26 | - | - | 22.6 | 1                  | 0.77 | - | - |
| Yes | 10 (5)   | 8.8  | 0.69 (0.37 – 1.31) |      | - | - | 18.7 | 0.90 (0.44 – 1.85) |      | - | - |
| NA  | 64       |      |                    |      |   |   |      |                    |      |   |   |

---

<sup>a</sup> Local assessment. MSS: microsatellite stable; pMMR: proficient mismatch repair; n: number; HR: homologous recombination; HRD: homologous recombination deficiency; HRP: homologous recombination proficient; ECOG-PS: Eastern Cooperative Oncology Group Performance Status; NA: not available; mut: mutated; wt: wild-type; TMB: Tumor Mutational Burden; Mb: Mega-base.

<sup>b</sup> Caris MI TumorSeek Panel

## Supplementary Figures

**Supplementary Figure 1:** Frequency of HR-related genes alterations in MSI-H/dMMR cohort of the overall population (Panel A); Frequency of tumors according to number of mutated HR-related genes in MSI-H/dMMR cohort of the overall population (Panel B); Frequency of tumors according to mutated HR-related genes belonging to “core” and “related” homologous recombination system in MSI-H/dMMR cohort of the overall population (Panel C). HR: homologous recombination; dMMR: deficient mismatch repair; MSI-H: microsatellite instability-high; MSS: microsatellite stable; pMMR: proficient mismatch repair.

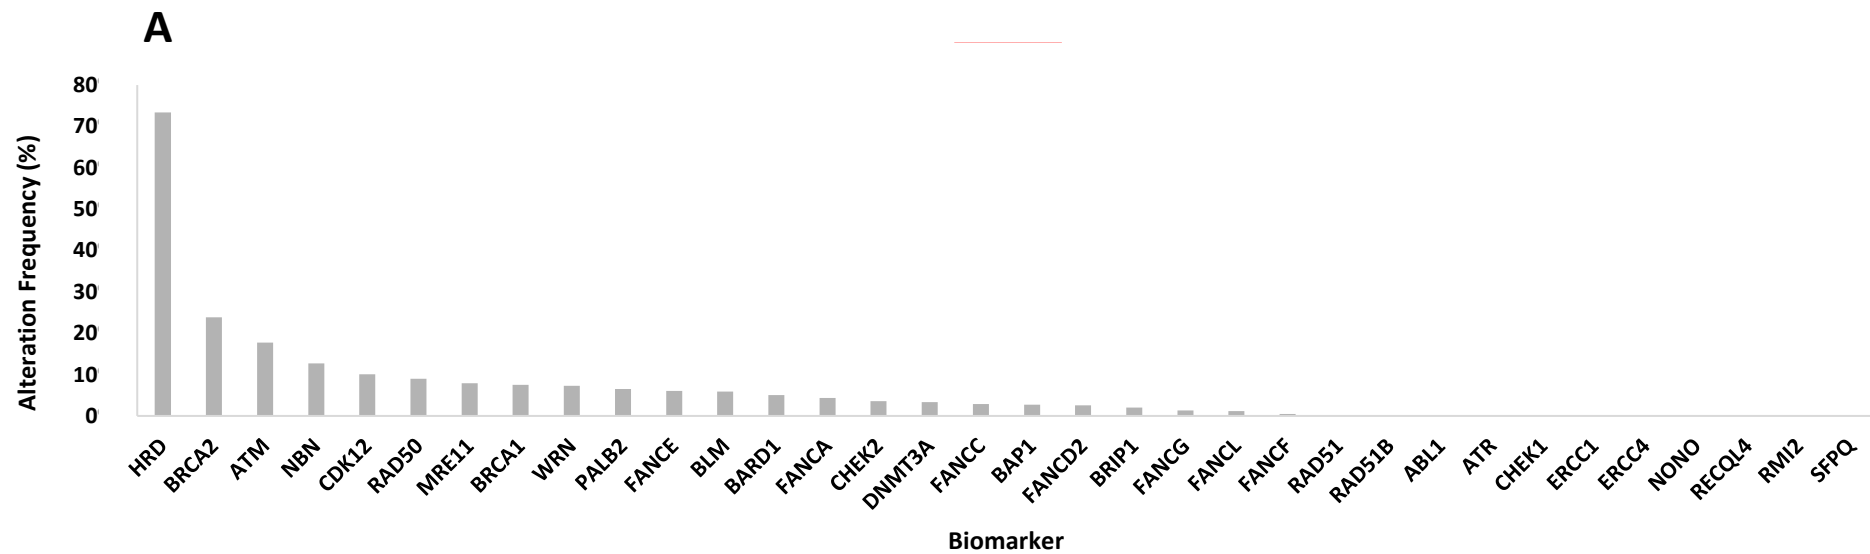

**B**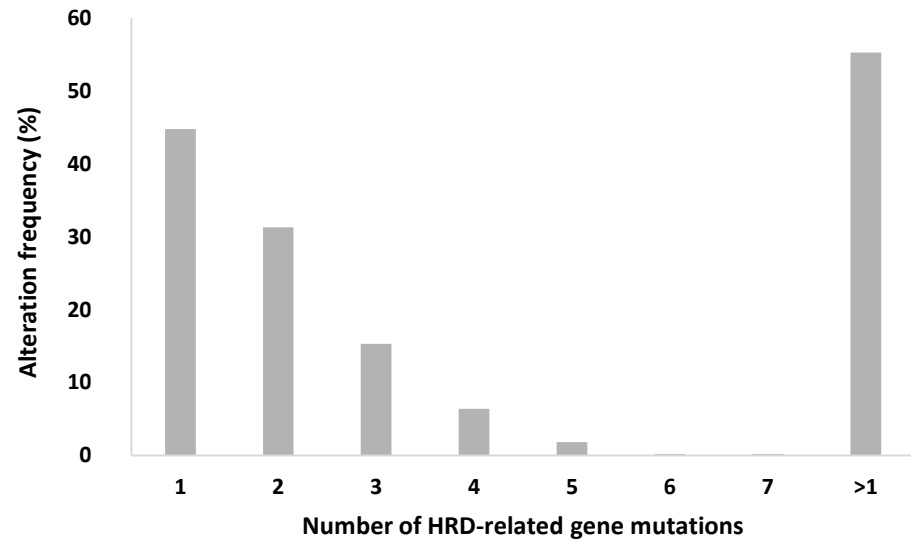**C**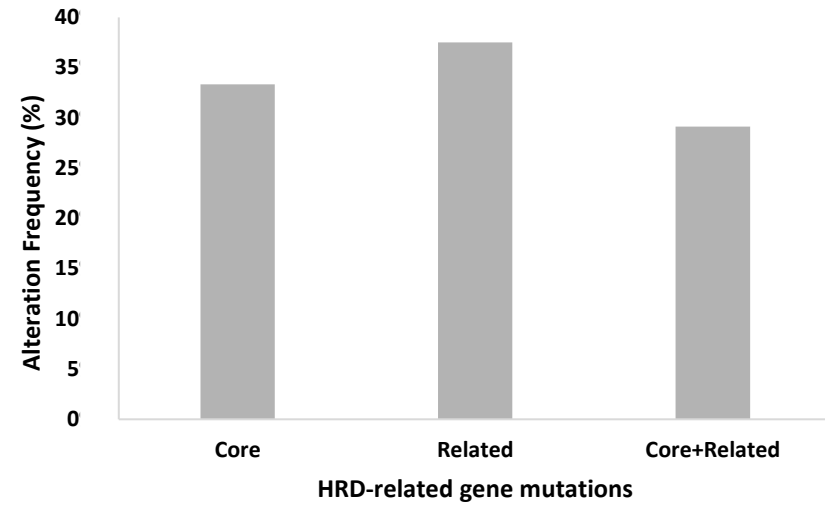

**Supplementary Figure 2:** Immune and stromal cell populations according to HR status by the MCP-counter analysis (Panel A); Immune checkpoint gene expression according to HR status by the MCP-counter analysis (Panel B); Heatmap of fold-change (HRD/HRP) in median immune and stromal cell populations, and immune checkpoint gene expression by the MCP-counter analysis (Panel C); indicates fold-change (HRD/HRP) in median gene expression levels by the MCP-counter analysis. Darker color means higher expression levels in HRD compared to HRP, while brighter color means the opposite directions. The median gene expression levels were compared between each subgroup, and the fold change was calculated. To adjust *P* values for multiple hypothesis testing, the *q* values were calculated using the Benjamini–Hochberg method. Statistical tests are two-sided. HRD: homologous repair deficit; HRP: homologous repair proficient; MCP: microenvironment cell population; MSI-H: microsatellite instability-high; MSS: microsatellite stable.

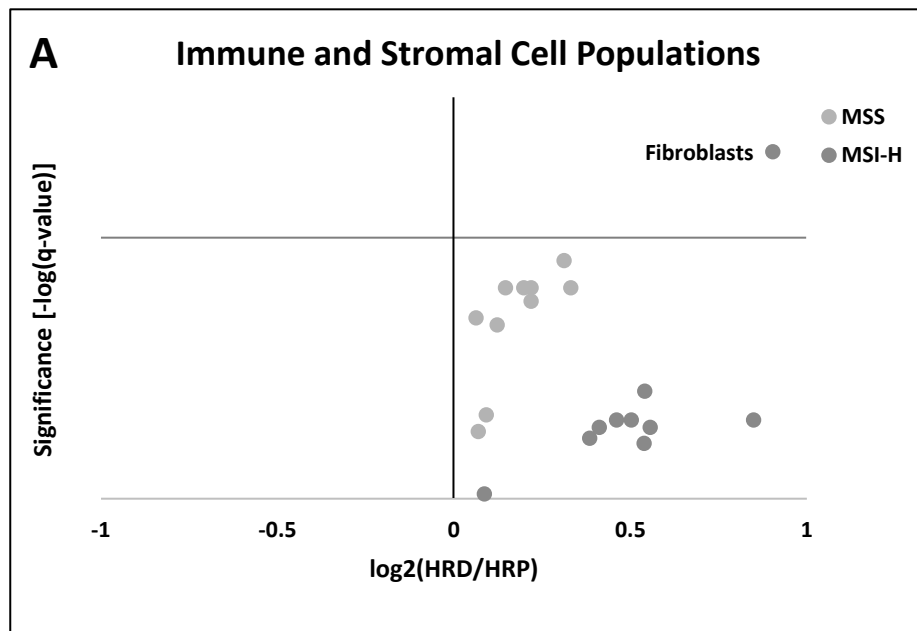

| Subgroup                                                                                                                  | Cohorts |     | T cells   | CD8 T cells | Cytotoxic lymphocytes | NK cells | B lineage | Monocytic lineage | Myeloid dendritic cells | Neutrophils | Endothelial cells | Fibroblasts | PD-1 | PD-L1 | PD-L2 | CTLA4 | TIM3 | LAG3 |  |
|---------------------------------------------------------------------------------------------------------------------------|---------|-----|-----------|-------------|-----------------------|----------|-----------|-------------------|-------------------------|-------------|-------------------|-------------|------|-------|-------|-------|------|------|--|
|                                                                                                                           |         |     | MSS cases | HRD         | HRP                   |          | *         | *                 |                         |             | *                 | *           |      | *     | *     |       |      |      |  |
| MSI-H cases                                                                                                               | HRD     | HRP |           |             |                       |          |           |                   |                         | *           |                   | **          |      |       |       |       |      |      |  |
| Maximum Fold-change                                                                                                       |         |     | 1.5       | 1.8         | 1.8                   | 1.4      | 1.3       | 1.4               | 1.5                     | 1.5         | 1.3               | 1.9         | 1.4  | 1.6   | 1.7   | 1.5   | 1.4  | 1.7  |  |
| Minimum Fold-change                                                                                                       |         |     | 1.1       | 1.3         | 1.1                   | 1        | 1         | 1.2               | 1.1                     | 1.1         | 1.1               | 1.2         | 1.1  | 1.1   | 1     | 0.9   | 1.2  | 0.9  |  |
| Note: Significant differences between cohorts indicated by *p<0.05 (Wilcoxon rank sum) and **q<0.05 (Benjamini-Hochberg). |         |     |           |             |                       |          |           |                   |                         |             |                   |             |      |       |       |       |      |      |  |

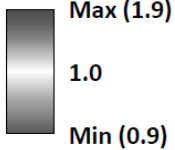



**Supplementary Figure 3:** Heatmap of fold-change (HRD/HRP) in median HR-related genes expression. Darker color means higher expression levels in HRD compared to HRP, while brighter color means the opposite directions. The median gene expression levels were compared between each subgroup, and the fold change was calculated. To adjust *P* values for multiple hypothesis testing, the q values were calculated using the Benjamini–Hochberg method. Statistical tests are two-sided. HR: homologous repair; HRD: homologous repair deficit; HRP: homologous repair proficient, MSI-H: microsatellite instability-high; MSS: microsatellite stable.

| Subgroup            | Cohorts |     | ABL1 | ATM | ATR | BAP1 | BARD1 | BLM | BRCA1 | BRCA2 | BRIP1 | CDK12 | CHEK1 | CHEK2 | DNMT3A | ERCC1 | ERCC4 | FANCA | FANCC | FANCD2 | FANCE | FANCF | FANCG | FANCL | MRE11A | NBN | NONO | PALB2 | RAD50 | RAD51 | RAD51B | RECQL4 | RMI2 | SFPQ | WRN |
|---------------------|---------|-----|------|-----|-----|------|-------|-----|-------|-------|-------|-------|-------|-------|--------|-------|-------|-------|-------|--------|-------|-------|-------|-------|--------|-----|------|-------|-------|-------|--------|--------|------|------|-----|
|                     | MSI-H   | MSS | **   |     | **  | **   | **    |     |       | **    | **    | **    | **    | **    | **     |       |       | **    |       | **     | **    | **    | **    | **    | **     | **  | **   | **    | **    | **    | **     | **     | *    | **   |     |
| All cases           | MSI-H   | MSS | **   |     | **  | **   | **    |     |       | **    | **    | **    | **    | **    | **     |       |       | **    |       | **     | **    | **    | **    | **    | **     | **  | **   | **    | **    | **    | **     | *      | **   |      |     |
| MSS cases           | HRD     | HRP |      |     |     |      |       |     |       |       |       |       |       |       |        |       |       |       |       |        |       |       |       |       |        |     |      |       |       |       |        |        | *    |      |     |
| MSI-H cases         | HRD     | HRP |      |     |     |      |       |     |       |       |       |       |       |       |        |       |       |       |       |        |       |       |       |       |        |     |      |       |       |       |        |        |      |      |     |
| Maximum Fold-change |         |     | 1.3  | 1.3 | 1.1 | 1.3  | 1.4   | 1.4 | 1.5   | 1.6   | 1.3   | 1.3   | 1.3   | 1.1   | 1.6    | 1.3   | 1.3   | 1.4   | 1.2   | 1.3    | 1.3   | 1.5   | 1.5   | 1.5   | 1.3    | 1.3 | 1.4  | 1.3   | 1.4   | 1.3   | 1.4    | 1.3    | 1.4  | 1.2  | 1.1 |
| Minimum Fold-change |         |     | 0.9  | 0.9 | 0.9 | 0.9  | 0.7   | 0.8 | 0.6   | 0.8   | 0.8   | 0.8   | 0.9   | 0.8   | 0.9    | 0.8   | 0.8   | 0.8   | 0.8   | 0.9    | 0.8   | 0.8   | 0.7   | 0.9   | 0.8    | 0.6 | 0.9  | 0.8   | 0.6   | 0.9   | 0.9    | 0.8    | 0.8  | 0.8  | 0.9 |

Note: \**p*<0.05 and \*\**q*<0.05 indicate significant difference between cohorts.

**Supplementary Figure 4:** Frequency of HR-related genes alterations according to loss of heterozygosity in the MSS/pMMR population. HR: homologous recombination; LOH: loss of heterozygosity; MSS: microsatellite stable; pMMR: proficient mismatch repair

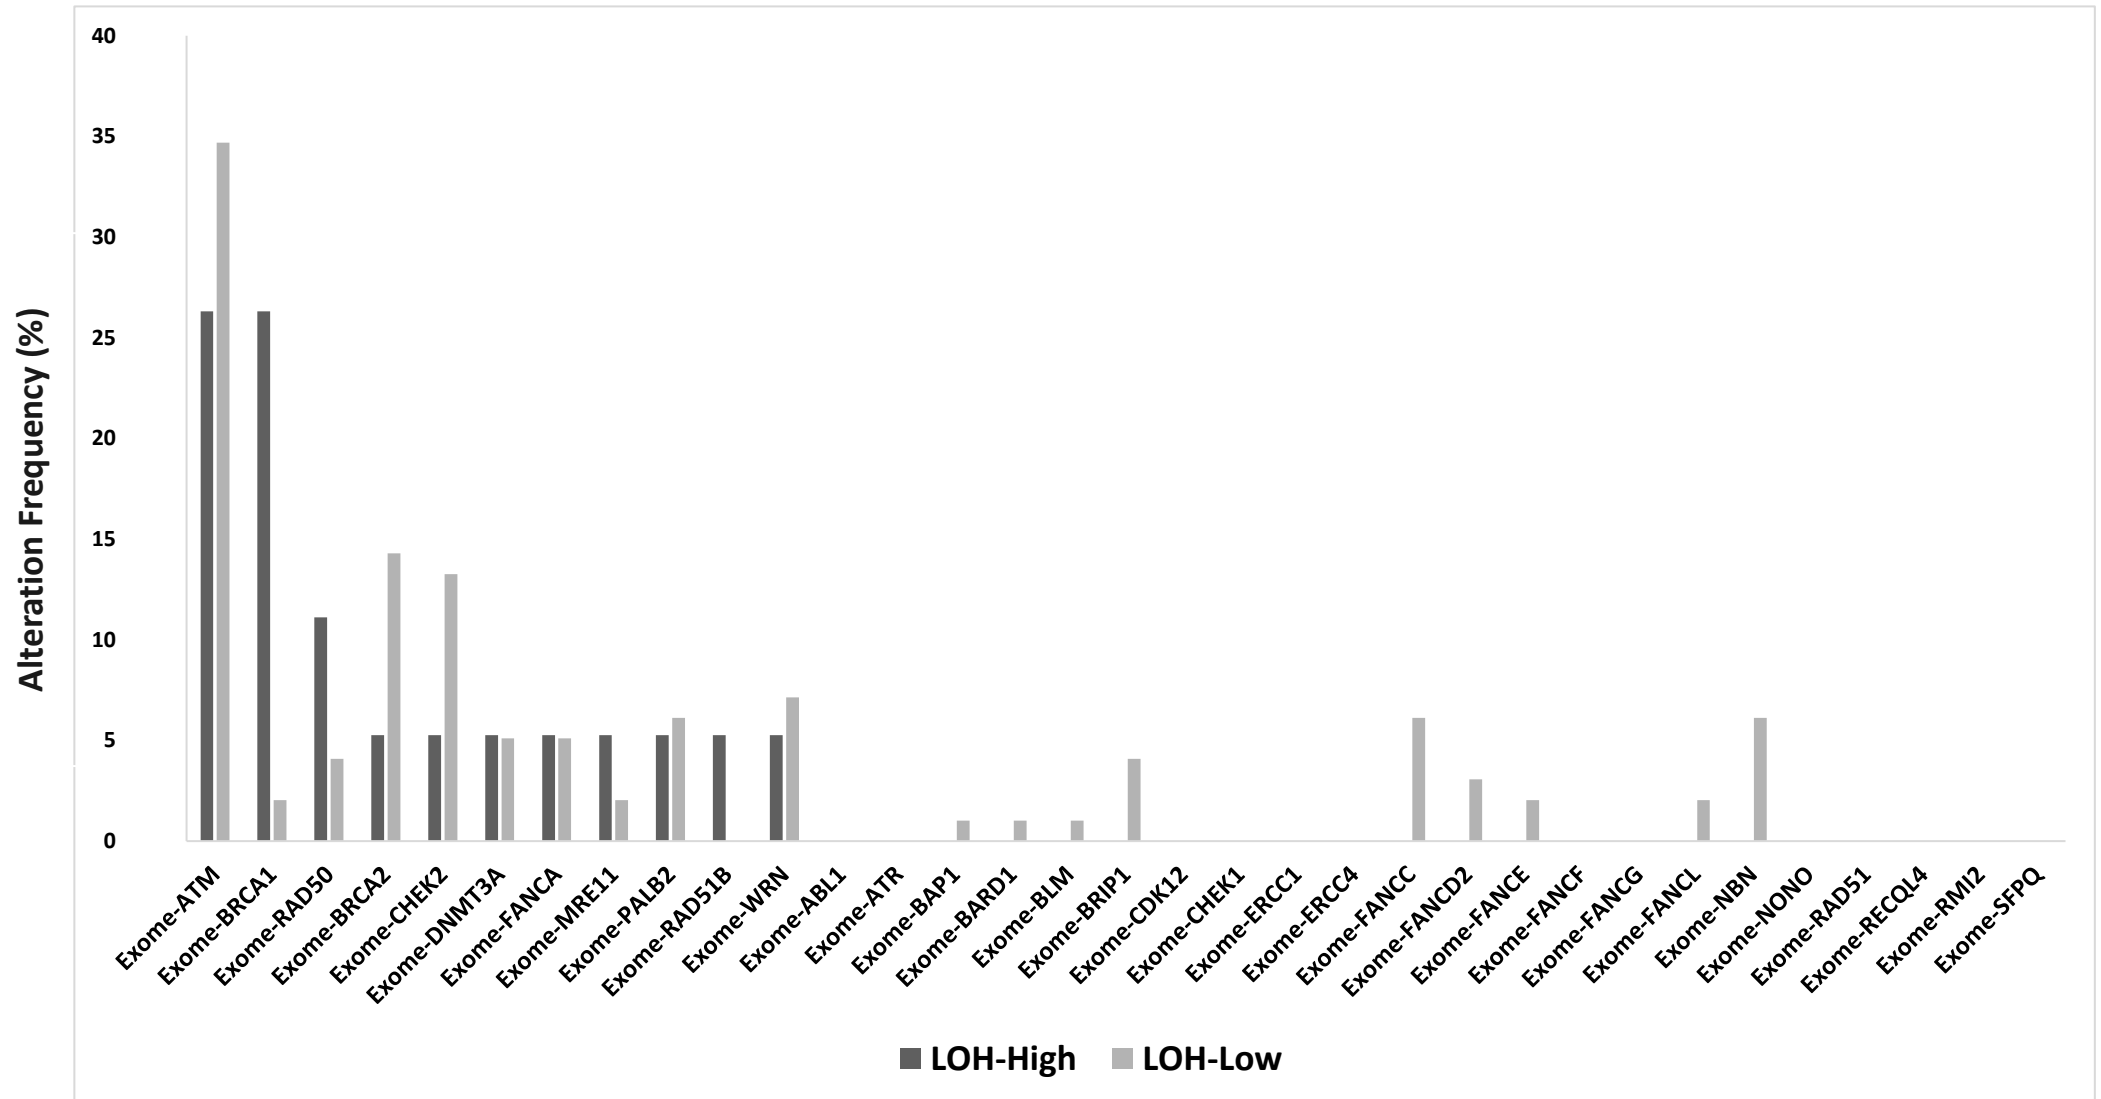

**Supplementary Figure 5:** Consort diagram of TRIBE2 population. dMMR: deficient mismatch repair; HRD: homologous repair deficient; HRP: homologous repair proficient; MSS: microsatellite stable; NGS: next generation sequencing; MSI-H: microsatellite instability-high; pMMR: proficient mismatch repair.

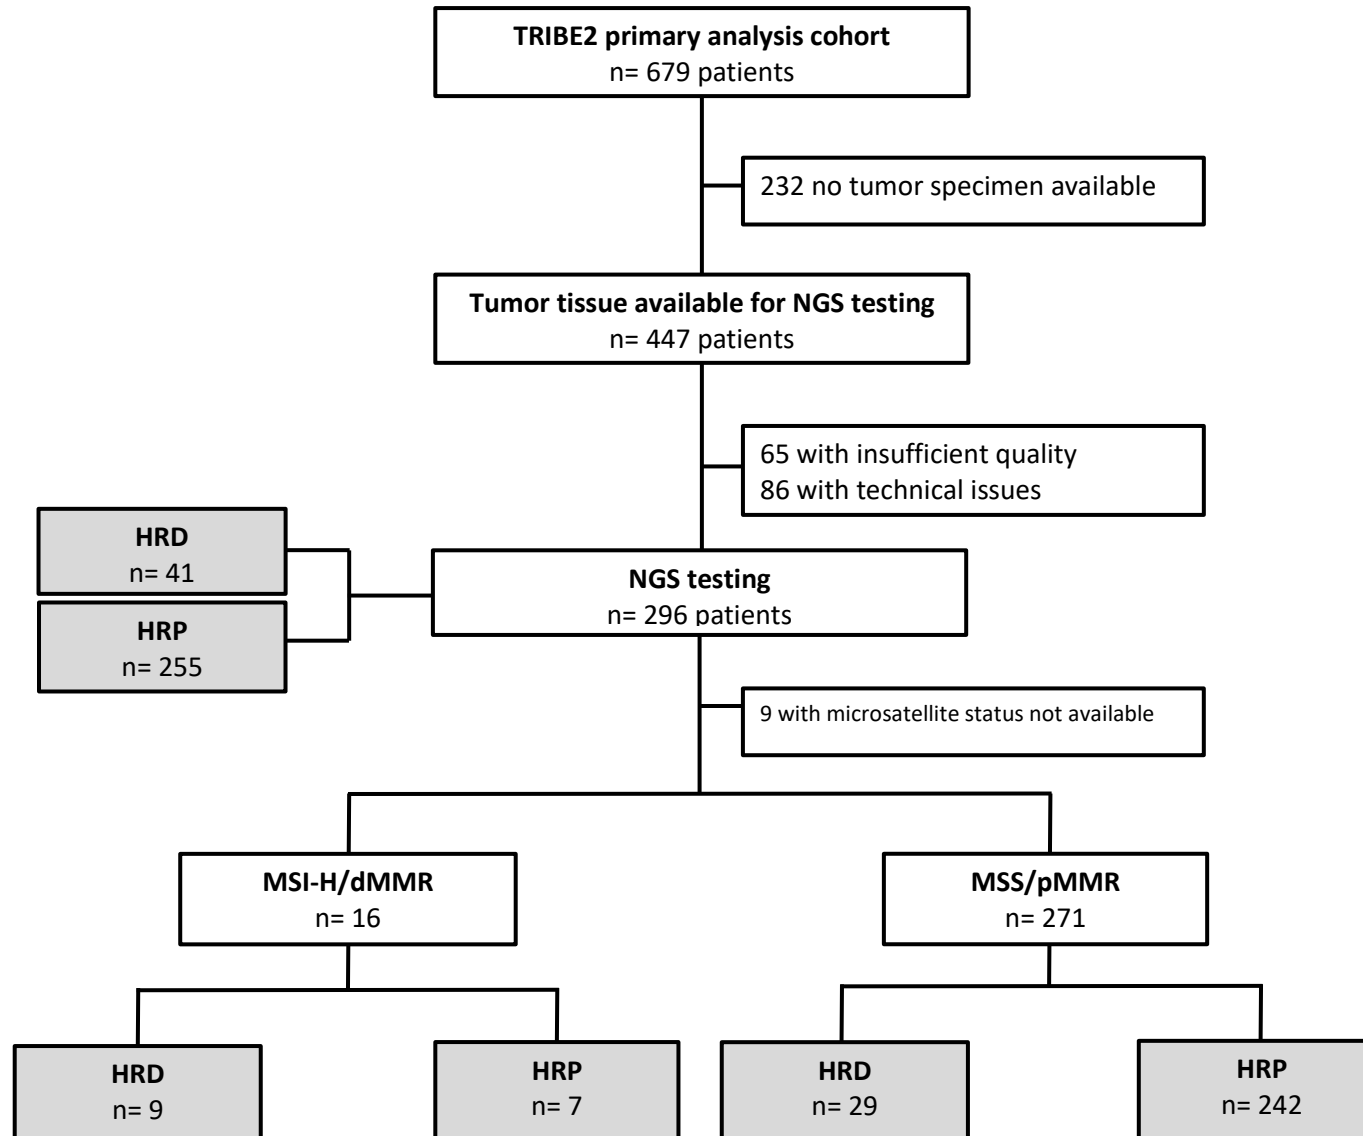

**Supplementary Figure 6:** Frequency of HR-related genes alterations in both MSS/pMMR (Panel A) and MSI-H/dMMR (Panel B) cohorts of the TRIBE2 population. dMMR: deficient mismatch repair; HR: homologous repair; MSS: microsatellite stable MSI-H: microsatellite instability-high; pMMR: proficient mismatch repair.

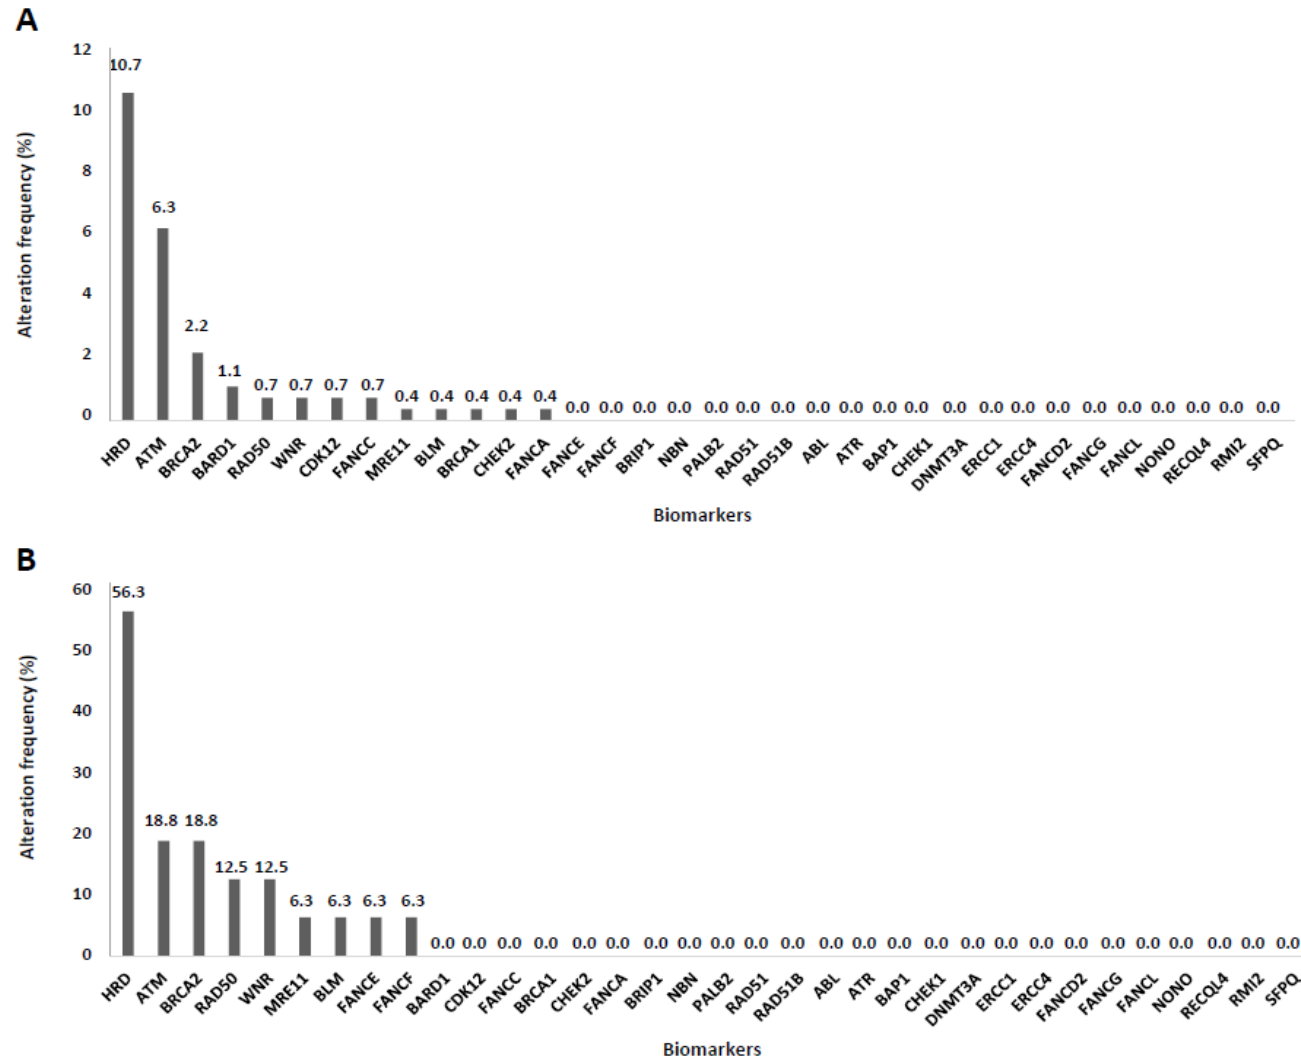



**Supplementary Figure 8:** Kaplan-Meier curves of progression-free survival (Panel A) and overall survival (Panel B) according to HR status and treatment arm in in MSS/pMMR patients of the TRIBE2 population. Survival curves were compared using a two-sided log-rank test. Two-sided interaction test between treatment arms and HR status is shown. Bev: bevacizumab; HR: homologous recombination; HRD: homologous recombination deficient; HRP: homologous recombination proficient; MSS: microsatellite stable; pMMR: proficient mismatch repair.

Supplementary figure 8

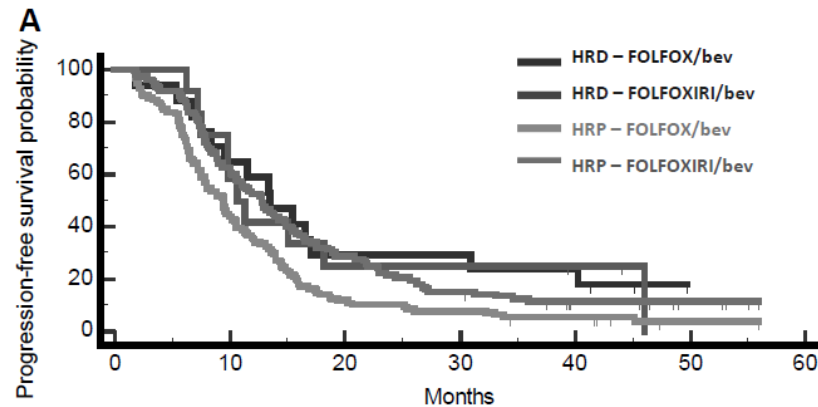

Number at risk

|                            |     |    |    |    |   |   |   |
|----------------------------|-----|----|----|----|---|---|---|
| Group: HRD - FOLFOX/bev    | 17  | 11 | 5  | 5  | 4 | 0 | 0 |
| Group: HRD - FOLFOXIRI/bev | 12  | 7  | 3  | 3  | 2 | 0 | 0 |
| Group: HRP - FOLFOX/bev    | 130 | 56 | 15 | 10 | 6 | 1 | 0 |
| Group: HRP - FOLFOXIRI/bev | 112 | 69 | 32 | 17 | 8 | 4 | 0 |

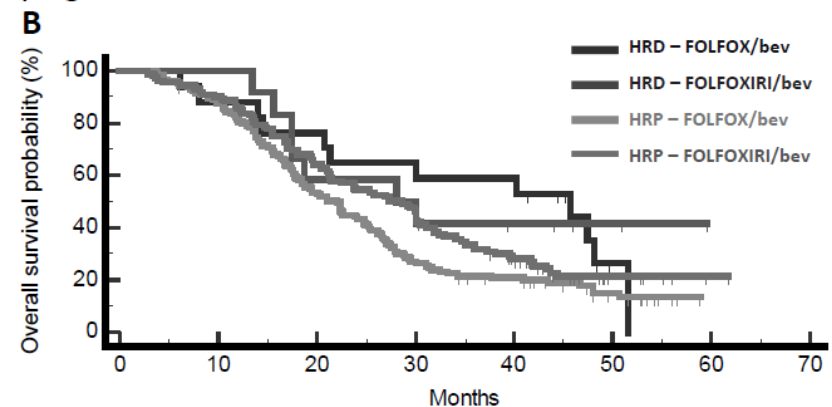

Number at risk

|                            |     |     |    |    |    |    |   |   |
|----------------------------|-----|-----|----|----|----|----|---|---|
| Group: HRD - FOLFOX/bev    | 17  | 15  | 13 | 11 | 10 | 1  | 0 | 0 |
| Group: HRD - FOLFOXIRI/bev | 12  | 12  | 7  | 5  | 4  | 2  | 0 | 0 |
| Group: HRP - FOLFOX/bev    | 130 | 113 | 69 | 35 | 24 | 10 | 0 | 0 |
| Group: HRP - FOLFOXIRI/bev | 112 | 101 | 72 | 50 | 27 | 6  | 1 | 0 |

|                       | HRD<br>FOLFOX/bev<br>n = 17 | HRD<br>FOLFOXIRI/bev<br>n = 12 | HRP<br>FOLFOX/bev<br>n = 130 | HRP<br>FOLFOXIRI/bev<br>n = 112 |                      | HRD<br>FOLFOX/bev<br>n = 17 | HRD<br>FOLFOXIRI/bev<br>n = 12 | HRP<br>FOLFOX/bev<br>n = 130 | HRP<br>FOLFOXIRI/bev<br>n = 112 |
|-----------------------|-----------------------------|--------------------------------|------------------------------|---------------------------------|----------------------|-----------------------------|--------------------------------|------------------------------|---------------------------------|
| Events, n (%)         | 14 (82.3%)                  | 10 (83.3%)                     | 123 (94.6%)                  | 99 (88.4%)                      | Events, n (%)        | 12 (70.5%)                  | 7 (58.3%)                      | 108 (83.1%)                  | 85 (75.9%)                      |
| Median PFS,<br>months | 13.5                        | 10.7                           | 9.4                          | 12.7                            | Median OS,<br>months | 45.7                        | 28.0                           | 22.0                         | 27.4                            |
| HR<br>[95% CI]        | 1                           | 1.07<br>[0.47 – 2.45]          | 1                            | 0.63<br>[0.48 – 0.82]           | HR<br>[95% CI]       | 1                           | 0.93<br>[0.37 – 2.35]          | 1                            | 0.75<br>[0.56 – 0.99]           |
| p                     | 0.87                        |                                | <0.001                       |                                 | p                    | 0.87                        |                                | 0.045                        |                                 |
| p                     | 0.002                       |                                |                              |                                 | p                    | 0.04                        |                                |                              |                                 |
| p for interaction     | 0.23                        |                                |                              |                                 | p for interaction    | 0.67                        |                                |                              |                                 |
